# Supplementary material for: Rearing and Maintenance of Galleria mellonella and Its Application to Study Fungal Virulence
Source: PubMed Central journal article supplement (PMC7558789; doi:10.3390/jof6030130), 2020-08-07
Supplement: jof-06-00130-s001.pdf [file jof-06-00130-s001.pdf]

## Supplementary Materials: Rearing and Maintenance of *Galleria mellonella* and its Application to Study Fungal Virulence

**Table S1.** Equipment and average cost in US dollars involved in propagating *Galleria mellonella* in the laboratory.

| <b>Expenditure</b> | <b>Item</b>                                                                                | <b>Cost</b> | <b>Total One-Off Expense</b>      |                             |
|--------------------|--------------------------------------------------------------------------------------------|-------------|-----------------------------------|-----------------------------|
| <b>One-off</b>     | Glass housing jar (minimum 3 required)                                                     | \$5.70      | \$36.80                           |                             |
|                    | Ultra-thin stainless-steel wire mesh, sieve size 0.1 mm <sup>2</sup> (per m <sup>2</sup> ) | \$17.50     |                                   |                             |
|                    | Perforated hose clamp seal (78–102 mm)                                                     | \$3.60      |                                   |                             |
|                    | <b>Item</b>                                                                                | <b>Cost</b> | <b>Total Cost for One Feeding</b> | <b>Total Cost per Month</b> |
| <b>Recurring</b>   | Glycerol (58.3 g)                                                                          | \$2.20      | \$5.30                            | \$42.40                     |
|                    | Organic honey (58.3 g)                                                                     | \$0.80      |                                   |                             |
|                    | Farex® Original multigrain cereal—fine grain, 6+ months (250 g)                            | \$2.10      |                                   |                             |
|                    | Baker's Yeast (8 g)                                                                        | \$0.20      |                                   |                             |
